# Supplementary material
Source: HighWire-hosted journal article supplement (https://erj.ersjournals.com/content/58/6/2101560)
Supplement: inline-supplementary-material-1 [file inline-supplementary-material-1.pdf]

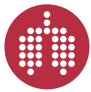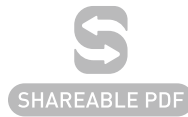

# The prognostic role of matrix metalloproteinase-7 in scleroderma-associated interstitial lung disease

Scott M. Matson<sup>1</sup>, Seoyeon J. Lee <sup>2</sup>, Ryan A. Peterson <sup>3</sup>, Natalia A. Achtar-Zadeh<sup>2</sup>, Francesco Boin<sup>4</sup>, Paul J. Wolters<sup>2</sup> and Joyce S. Lee<sup>5</sup>

<sup>1</sup>Dept of Medicine, Division of Pulmonary, Critical Care and Sleep Medicine, University of Kansas School of Medicine, Kansas City, KS, USA. <sup>2</sup>Dept of Medicine, Division of Pulmonary, Critical Care, Allergy, and Sleep, University of California, San Francisco, CA, USA. <sup>3</sup>Dept of Biostatistics and Informatics, Colorado School of Public Health, University of Colorado – Anschutz Medical Campus, Aurora, CO, USA. <sup>4</sup>Dept of Medicine, Division of Rheumatology, Cedars-Sinai Medical Center, Los Angeles, CA, USA. <sup>5</sup>Dept of Medicine, Division of Pulmonary Sciences and Critical Care Medicine, University of Colorado – Anschutz Medical Campus, Aurora, CO, USA.

Corresponding author: Scott M. Matson ([smatson@kumc.edu](mailto:smatson@kumc.edu))

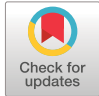

Shareable abstract (@ERSpublications)

**Matrix metalloproteinase-7 level is associated with worse baseline pulmonary function and worse transplant-free survival in scleroderma interstitial lung disease** <https://bit.ly/3zZhja7>

**Cite this article as:** Matson SM, Lee SJ, Peterson RA, *et al.* The prognostic role of matrix metalloproteinase-7 in scleroderma-associated interstitial lung disease. *Eur Respir J* 2021; 58: 2101560 [DOI: 10.1183/13993003.01560-2021].

This single-page version can be shared freely online.

Copyright ©The authors 2021.  
For reproduction rights and  
permissions contact  
[permissions@ersnet.org](mailto:permissions@ersnet.org)

Received: 2 June 2021  
Accepted: 4 Sept 2021

*To the Editor:*

Systemic sclerosis (SSc) has the highest mortality rate amongst rheumatologic diseases [1]. It is characterised by endothelial dysfunction resulting in a small vessel vasculopathy leading to inflammation and fibrosis of skin and internal organs, including the lungs [1]. Pulmonary manifestations of SSc (pulmonary hypertension and interstitial lung disease (ILD)) account for the majority of deaths in these patients, and ILD alone accounts for a third of the mortality observed in SSc patients [2].
